# Supplementary material for: High nitrogen-content carbon nanosheets formed using the Schiff-base reaction in a molten salt medium as efficient anode materials for lithium-ion batteries
Source: Royal Society of Chemistry journal article supplement (doi:10.1039/c4ta05056h), 2014-11-06
Supplement: c4ta05056h1.pdf [file c4ta05056h1.pdf]

# High nitrogen-content carbon nanosheets formed using a Schiff-base reaction in a molten salt medium as efficiency anode materials for lithium-ion batteries

Bin He, Wen-Cui Li, and An-Hui Lu\*

State Key Laboratory of Fine Chemicals, School of Chemical Engineering, Dalian University of Technology, Dalian 116024, P. R. China

\* E-mail: anhuilu@dlut.edu.cn, Tel/Fax: +86-411-84986112

Table. S1 Comparison of the electrochemical performance of carbon-based anodes in literature.

| Type of material    | Reversible capacity <sup>[a]</sup><br>(mAh/g) | Initial efficiency <sup>[b]</sup><br>(%) | Rate performance |       | Reference  |
|---------------------|-----------------------------------------------|------------------------------------------|------------------|-------|------------|
|                     |                                               |                                          | [c]              | [d]   |            |
| NC-2                | 605.3                                         | 63.1                                     | 430.0            | 396.1 | This study |
| Carbon spheres      | 600.0                                         | 41.6                                     | 390              | –     | [1]        |
| BCN nanosheets      | 424                                           | 51                                       | 300              | –     | [2]        |
| Carbon nanospheres  | –                                             | 41.7                                     | 370              | 280   | [3]        |
| Carbon nanosheets   | –                                             | 38.6                                     | –                | 350   | [4]        |
| Porous Carbon       | 400                                           | 47                                       | –                | 178   | [5]        |
| Graphene paper      | 568                                           | 79.2                                     | 210              | 169   | [6]        |
| Graphene papers     | 175                                           | 40                                       | 268              | –     | [7]        |
| Porous hard carbons | 519.6                                         | 40.8                                     | 279.7            | –     | [8]        |

[a] The reversible capacity at the current density  $\leq 100 \text{ mA g}^{-1}$ . This study test at  $100 \text{ mA g}^{-1}$ . [b] The initial efficiency at the current density  $\leq 100 \text{ mA g}^{-1}$ . This study test at  $100 \text{ mA g}^{-1}$ . [c] The rate performance at the current density  $\leq 500 \text{ mA g}^{-1}$ . This study test at  $500 \text{ mA g}^{-1}$ . [d] The rate performance at the current density  $\leq 1000 \text{ mA g}^{-1}$ .

This study test at 1000 mA g<sup>-1</sup>.

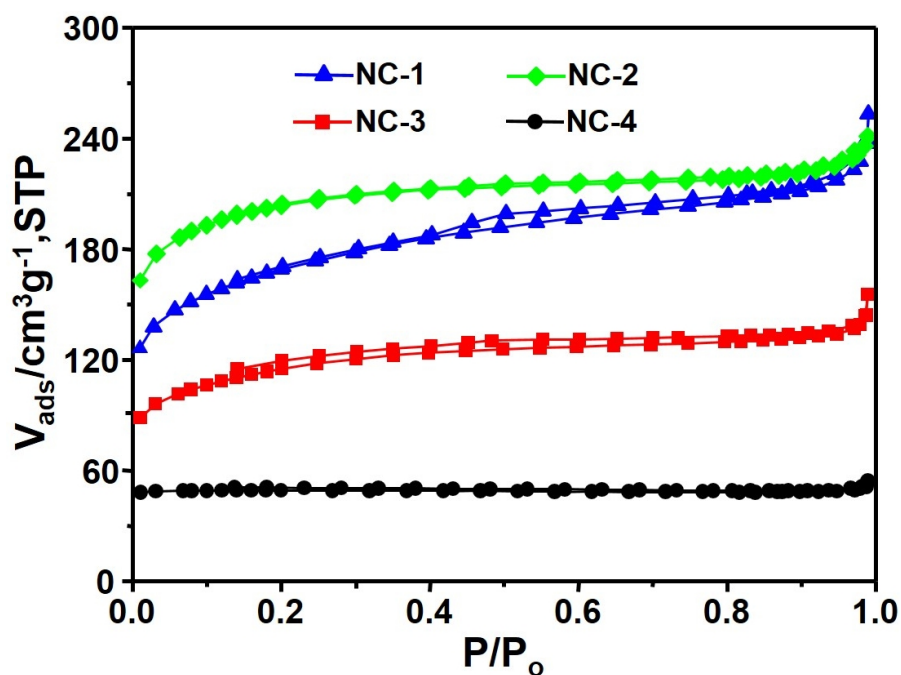

**Figure S1.** N<sub>2</sub> sorption isotherms for NC-1, NC-2, NC-3 and NC-4. The isotherms of NC-3 and NC-4 were vertically offset by 20 and 40 cm<sup>3</sup>g<sup>-1</sup> STP, respectively.

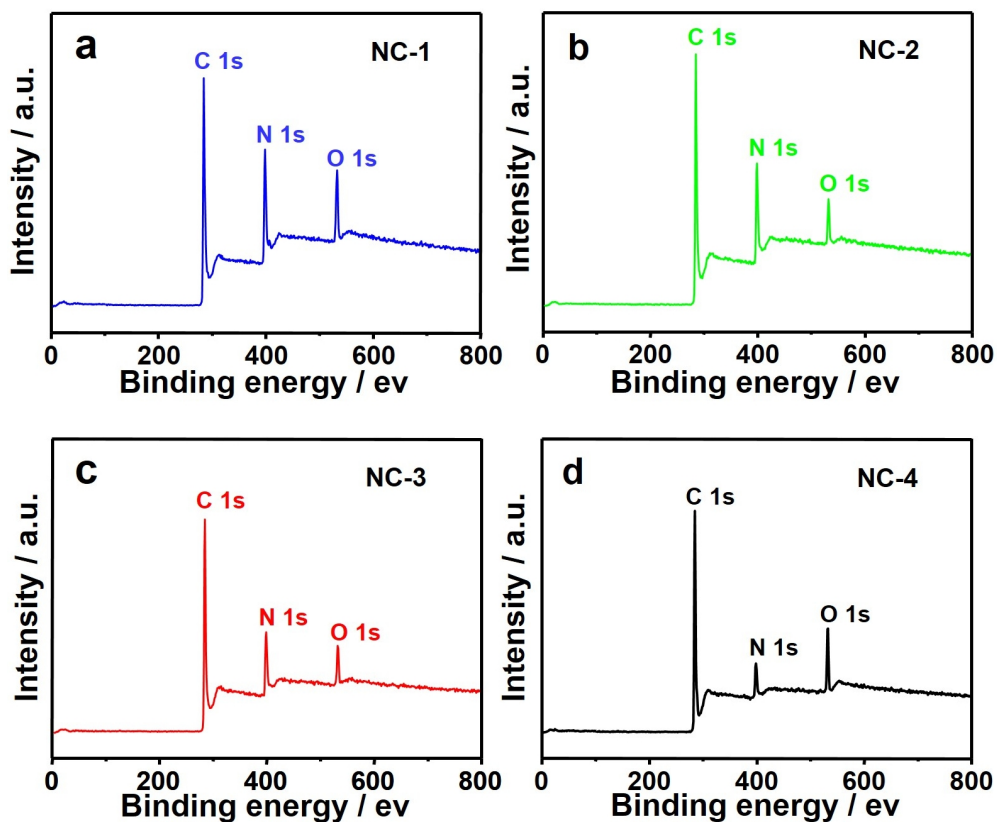

**Figure S2.** The XPS of (a) NC-1, (b) NC-2, (c) NC-3 and (d) NC-4.

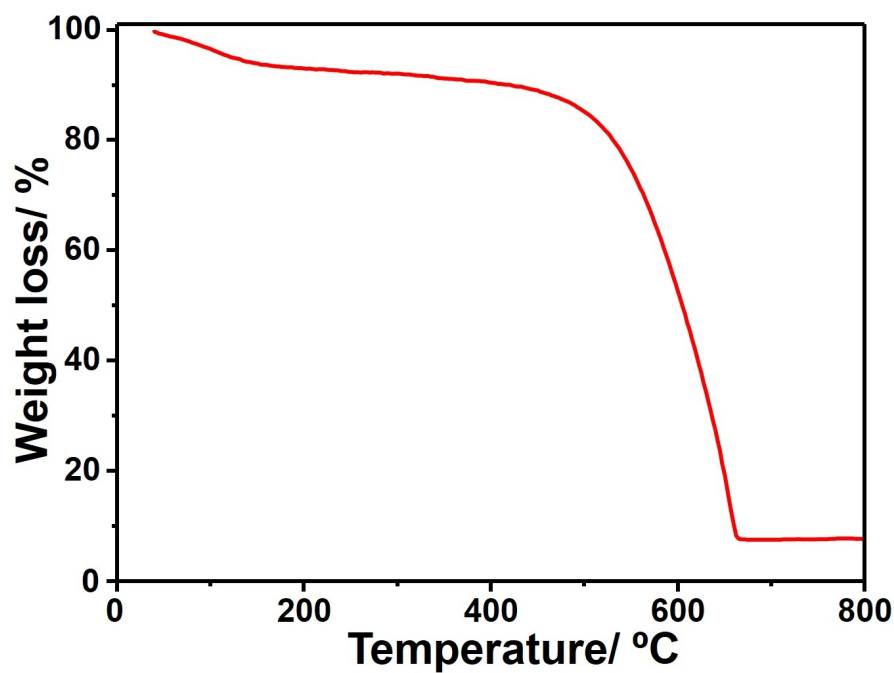

**Figure S3.** TG curve of the NC-2. It shows that about 7.5% salt residue is present in the sample NC-2 after intensive washing.

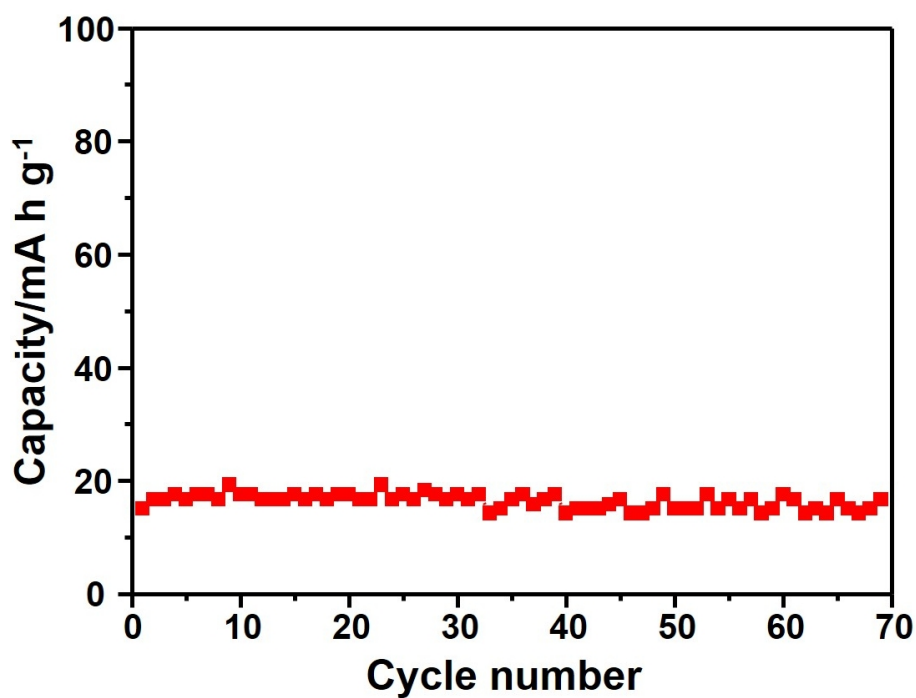

**Figure S4.** The cycle performance of commercial natural graphite at a current density of 3000 mA g<sup>-1</sup> in the range of 0.005-3 V.

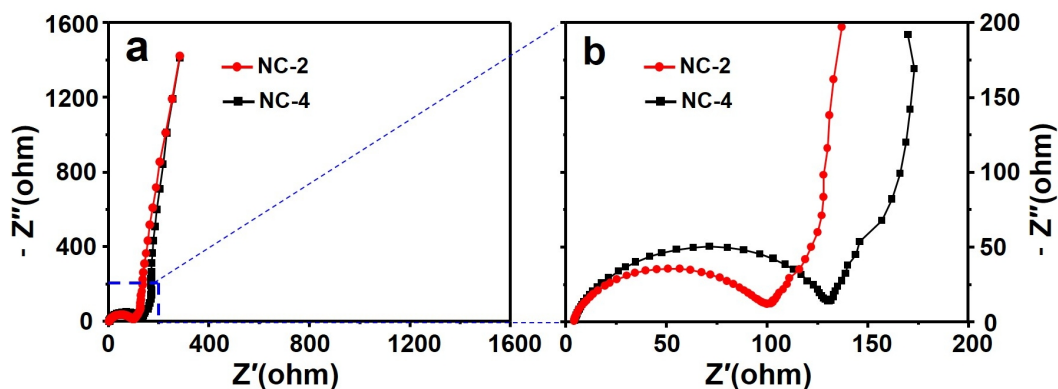

**Figure S5.** (a) Electrochemical impedance spectroscopy of NC-2 and NC-4, (b) close-up of Nyquist plots at a high frequency.

## References

- [1] S. B. Yang, X. L. Feng, L. J. Zhi, Q. Cao, J. Maier, K. Müllen, *Adv. Mater.*, 2010, 22, 838-842.
- [2] W. W. Lei, S. Qin, D. Liu, D. Portehault, Z. W. Liu, Y. Chen, *Chem. Commun.*, 2013, 49, 352-354.
- [3] K. Tang, R. J. White, X. K. Mu, M. M. Titirici, Peter A. V. Aken, J. Maier, *ChemSusChem*, 2012, 5, 400-403.
- [4] R. R. Song, H. H. Song, J. S. Zhou, X. H. Chen, B. Wu, H. Y. Yang, *J. Mater. Chem.* 2012, 22, 12369-12374.
- [5] G. P. Hao, F. Han, D. C. Guo, R. J. Fan, G. Xiong, W. C. Li, A. H. Lu, *J. Phys. Chem. C*, 2012, 116, 10303-10311.
- [6] F. Liu, S. Y. Song, D. F. Xue, H. J. Zhang, *Adv. Mater.*, 2012, 24, 1089-1094.
- [7] Y. H. Hu, X. F. Li, D. S. Geng, M. Cai, R. Y. Li, X. L. Sun, *Electrochimica Acta* 2013, 91, 227-233.
- [8] Q. T. Zhang, H. X. Sun, X. M. Wang, Z. Q. Zhu, W. D. Liang, A. Li, S. H. Wen, W. Q. Deng, *Energy Technol.*, 2013, 1, 721-725.
